# Index to Volume 53

---

## Articles

|                                                                                                                                                                                                            |      |
|------------------------------------------------------------------------------------------------------------------------------------------------------------------------------------------------------------|------|
| <b>Aglen, A.</b> Impact of fish distribution and species composition on the relationship between acoustic and swept-area estimates of fish density . . . . .                                               | 501  |
| <b>Andreeva, I. B., and Belousov, A. V.</b> Multiple sound scattering by densely packed shoals of marine animals. . . . .                                                                                  | 323  |
| <b>Arrhenius, F.</b> Diet composition and food selectivity of 0-group herring ( <i>Clupea harengus</i> L.) and sprat ( <i>Sprattus sprattus</i> (L.)) in the northern Baltic Sea . . . . .                 | 701  |
| <b>Arrhenius, F., and Hansson, S.</b> Growth and seasonal changes in energy content of young Baltic Sea herring ( <i>Clupea harengus</i> L.) . . . . .                                                     | 792  |
| <b>Aure, J., Danielssen, D., and Sætre, R.</b> Assessment of eutrophication in Skagerrak coastal waters using oxygen consumption in fjordic basins . . . . .                                               | 589  |
| <b>Baldursson, F. M., Danielsson, A., and Stefánsson, G.</b> On the rational utilization of the Icelandic cod stock. . . . .                                                                               | 643  |
| <b>Barange, M., Hampton, I., and Soule, M. A.</b> Empirical determination of <i>in situ</i> target strengths of three loosely aggregated pelagic fish species . . . . .                                    | 225  |
| <b>Barrett, R. T., and Krasnov, Y. V.</b> Recent responses to changes in stocks of prey species by seabirds breeding in the southern Barents Sea . . . . .                                                 | 713  |
| <b>Becker, G. A., and Pauly, M.</b> Sea surface temperature changes in the North Sea and their causes . . . . .                                                                                            | 887  |
| <b>Bembo, D. G., Carvalho, G. R., Cingolani, N., and Pitcher, T. J.</b> Electrophoretic analysis of stock structure in Northern Mediterranean anchovies, <i>Engraulis encrasicolus</i> . . . . .           | 115  |
| <b>Beukema, J. J., Essink, K., and Michaelis, H.</b> The geographic scale of synchronized fluctuation patterns in zoobenthos populations as a key to underlying factors: climatic or man-induced . . . . . | 964  |
| <b>Boddeke, R.</b> Changes in the brown shrimp ( <i>Crangon crangon</i> L.) population off the Dutch coast in relation to fisheries and phosphate discharge . . . . .                                      | 995  |
| <b>Bot, P. V. M., and Colijn, F.</b> A method for estimating primary production from chlorophyll concentrations with results showing trends in the Irish Sea and the Dutch coastal zone . . . . .          | 945  |
| <b>Casas, J. M., and Paz, J.</b> Recent changes in the feeding of cod ( <i>Gadus morhua</i> ) off the Flemish Cap, Newfoundland 1989–1993 . . . . .                                                        | 750  |
| <b>Castillo, J., Barbieri, M. A., and Gonzalez, A.</b> Relationship between sea surface temperature, salinity, and pelagic fish distribution off northern Chile . . . . .                                  | 139  |
| <b>Corten, A., and van de Kamp, G.</b> Variation in the abundance of southern fish species in the southern North Sea in relation to hydrography and wind . . . . .                                         | 1113 |
| <b>Cowan, J. H. Jr, Houde, E. D., and Rose K. A.</b> Size-dependent vulnerability of marine fish larvae to predation: an individual-based numerical experiment . . . . .                                   | 23   |
| <b>Daan, R., and Mulder, M.</b> On the short-term and long-term impact of drilling activities in the Dutch sector of the North Sea . . . . .                                                               | 1036 |
| <b>Danielssen, D. S., Svendsen, E., and Ostrowski, M.</b> Long-term hydrographic variation in the Skagerrak based on the section Torungen–Hirtshals . . . . .                                              | 917  |
| <b>de Groot, S. J.</b> Quantitative assessment of the development of the offshore oil and gas industry in the North Sea. . . . .                                                                           | 1045 |
| <b>Dethlefsen, V., von Westernhagen, H., and Cameron, P.</b> Malformations in North Sea pelagic fish embryos during the period 1984–1995 . . . . .                                                         | 1024 |
| <b>Duncan, A., and Kubecka, J.</b> Patchiness of longitudinal fish distributions in a river as revealed by a continuous hydroacoustic survey . . . . .                                                     | 161  |
| <b>Ehrenberg, J. E., and Torkelson, T. C.</b> Application of dual-beam and split-beam target tracking in fisheries acoustics . . . . .                                                                     | 329  |
| <b>Erzini, K., Gonçalves, J. M. S., Bentes, L., Lino, P. G., and Cruz, J.</b> Species and size selectivity in a Portuguese multispecies artisanal long-line fishery . . . . .                              | 811  |
| <b>Fernández de Puelles, M. L., Valdés, L., Varela, M., Alvarez-Ossorio, M. T., and Halliday, N.</b> Diel variations in the vertical distribution of copepods off the north coast of Spain. . . . .        | 97   |
| <b>Fjøsne, K., and Gjørseter, J.</b> Dietary composition and the potential of food competition between 0-group cod ( <i>Gadus morhua</i> L.) and some other fish species in the littoral zone. . . . .     | 757  |
| <b>Fossum, P.</b> A study of first-feeding herring ( <i>Clupea harengus</i> L.) larvae during the period 1985–1993. . . . .                                                                                | 51   |
| <b>Fréon, P., Gerlotto, F., and Soria, M.</b> Diel variability of school structure with special reference to transition periods . . . . .                                                                  | 459  |

|                                                                                                                                                                                                                                                           |      |
|-----------------------------------------------------------------------------------------------------------------------------------------------------------------------------------------------------------------------------------------------------------|------|
| <b>Frid, C. L. J., and Huliselan, N. V.</b> Far-field control of long-term changes in Northumberland (NW North Sea) coastal zooplankton. . . . .                                                                                                          | 972  |
| <b>Gledhill, C. T., Lyczkowski-Shultz, J., Rademacher, K., Kargard, E., Crist, G., and Grace, M. A.</b> Evaluation of video and acoustic index methods for assessing reef-fish populations . . . . .                                                      | 483  |
| <b>Goodson, A. D., and Sturtivant, C. R.</b> Sonar characteristics of the harbour porpoise ( <i>Phocoena phocoena</i> ): source levels and spectrum. . . . .                                                                                              | 465  |
| <b>González, A. F., Castro, B. G., and Guerra, A.</b> Age and growth of the short-finned squid <i>Illex coindetii</i> in Galician waters (NW Spain) based on statolith analysis . . . . .                                                                 | 802  |
| <b>Greve, W., Reiners, F., and Nast, J.</b> Biocoenotic changes of the zooplankton in the German Bight: the possible effects of eutrophication and climate . . . . .                                                                                      | 951  |
| <b>Griffiths, G., and Diaz, J. I.</b> Comparison of acoustic backscatter measurements from a ship-mounted Acoustic Doppler Current Profiler and an EK500 scientific echo-sounder . . . . .                                                                | 487  |
| <b>Hall, J. A., Frid, C. L. J., and Proudfoot, R. K.</b> Effects of metal contamination on macrobenthos of two North Sea estuaries . . . . .                                                                                                              | 1014 |
| <b>Hamano, A., Sasakura, T., Kieser, R., Cooke, K., Kubota, K., and Clay, A.</b> Target-strength measurements of Pacific hake ( <i>Merluccius productus</i> ) in Canadian waters using quasi-ideal and conventional beam transducers . . . . .            | 273  |
| <b>Hampton, I.</b> Acoustic and egg-production estimates of South African anchovy biomass over a decade: comparisons, accuracy, and utility . . . . .                                                                                                     | 493  |
| <b>Hansson, S., Rudstam, L. G., Kitchell, J. F., Hildén, M., Johnson, B. L., and Peppard, P. E.</b> Predation rates by North Sea cod ( <i>Gadus morhua</i> ) – predictions from models on gastric evacuation and bioenergetics. . . . .                   | 107  |
| <b>Haralabous, J., and Georgakarakos, S.</b> Artificial neural networks as a tool for species identification of fish schools . . . . .                                                                                                                    | 173  |
| <b>Hatfield, E. M. C.</b> Towards resolving multiple recruitment into loliginid fisheries: <i>Loligo gahi</i> in the Falkland Islands fishery . . . . .                                                                                                   | 565  |
| <b>Heessen, H. J. L., and Daan, N.</b> Long-term trends in ten non-target North sea fish species. . . . .                                                                                                                                                 | 1063 |
| <b>Heide-Jørgensen, M. P., and Reeves, R. R.</b> Evidence of a decline in beluga, <i>Delphinapterus leucas</i> , abundance off West Greenland. . . . .                                                                                                    | 61   |
| <b>Hewitt, R. P., and Demer, D. A.</b> Lateral target strength of Antarctic krill . . . . .                                                                                                                                                               | 297  |
| <b>Hislop, J. R. G.</b> Changes in North Sea gadoid stocks . . . . .                                                                                                                                                                                      | 1146 |
| <b>Huse, I., and Ona, E.</b> Tilt angle distribution and swimming speed of overwintering Norwegian spring spawning herring . . . . .                                                                                                                      | 863  |
| <b>Iida, K., Mukai, T., and Hwang, D.</b> Relationship between acoustic backscattering strength and density of zooplankton in the sound-scattering layer . . . . .                                                                                        | 507  |
| <b>Jaffe, J. S.</b> Temporal sampling of backscattered sonar signals . . . . .                                                                                                                                                                            | 359  |
| <b>Jiang, W., and Jørgensen, T.</b> The diet of haddock ( <i>Melanogrammus aeglefinus</i> L.) in the Barents Sea during the period 1984–1991. . . . .                                                                                                     | 11   |
| <b>Kehayias, G., Lykakis, J., and Fragopoulou, N.</b> The diets of the chaetognaths <i>Sagitta enflata</i> , <i>S. serratodentata atlantica</i> and <i>S. bipunctata</i> at different seasons in Eastern Mediterranean coastal waters. . . . .            | 837  |
| <b>Kloser, R. J.</b> Improved precision of acoustics surveys of benthopelagic fish by means of a deep-towed transducer . . . . .                                                                                                                          | 407  |
| <b>Kuikka, S., Suuronen, P., and Parmanne, R.</b> The impacts of increased codend mesh size on the northern Baltic herring fishery: ecosystem and market uncertainties . . . . .                                                                          | 723  |
| <b>Laane, R. W. P. M., Southward, A. J., Slinn, D. J., Allen, J., Groeneveld, G., and de Vries, A.</b> Changes and causes of variability in salinity and dissolved inorganic phosphate in the Irish Sea, English Channel, and Dutch coastal zone. . . . . | 933  |
| <b>Lewis, T. N., and Rogers, P. H.</b> The vibrational response of single-chambered fish swim-bladders to low-frequency sound. . . . .                                                                                                                    | 285  |
| <b>Lillo, S., Cordova, J., and Paillaman, A.</b> Target-strength measurements of hake and jack mackerel. . . . .                                                                                                                                          | 267  |
| <b>Macdonald, R. W., and Bowers, J. M.</b> Contaminants in the arctic marine environment: priorities for protection . . . . .                                                                                                                             | 537  |
| <b>MacLennan, D. N., and Holliday, D. V.</b> Fisheries and plankton acoustics: past, present, and future . . . . .                                                                                                                                        | 513  |
| <b>MacLennan, D. N., and Menz, A.</b> Interpretation of <i>in situ</i> target-strength data. . . . .                                                                                                                                                      | 233  |
| <b>Marchal, E., and Lebourges, A.</b> Acoustic evidence for unusual diel behaviour of a mesopelagic fish ( <i>Vinciguerria nimbaria</i> ), exploited by tuna . . . . .                                                                                    | 443  |

|                                                                                                                                                                                                                                                         |      |
|---------------------------------------------------------------------------------------------------------------------------------------------------------------------------------------------------------------------------------------------------------|------|
| <b>Martin, L. V., Stanton, T. K., Wiebe, P. H., and Lynch, J. F.</b> Acoustic classification of zooplankton . . . . .                                                                                                                                   | 217  |
| <b>Massé, J., Koutsikopoulos, C., and Patty, W.</b> The structure and spatial distribution of pelagic fish schools in multispecies clusters: an acoustic study . . . . .                                                                                | 155  |
| <b>McClatchie, S., Alsop, J., and Coombs, R. F.</b> A re-evaluation of relationships between fish size, acoustic frequency, and target strength . . . . .                                                                                               | 780  |
| <b>McClatchie, S., Alsop, J., Ye, Z., and Coombs, R. F.</b> Consequence of swimbladder model choice and fish orientation to target strength of three New Zealand fish species . . . . .                                                                 | 847  |
| <b>McGehee, D., and Jaffe, J. S.</b> Three-dimensional swimming behaviour of individual zooplankters: observations using the acoustical imaging system FishTV . . . . .                                                                                 | 363  |
| <b>Maucorps, A.</b> Opening address . . . . .                                                                                                                                                                                                           | 885  |
| <b>Meisfjord, J., and Sundt, R. C.</b> Genetic variation between populations of the harp seal, <i>Phoca groenlandica</i> . . . . .                                                                                                                      | 89   |
| <b>Michalsen, K., Godø, O. R., and Fernø, A.</b> Diel variation in the catchability of gadoids and its influence on the reliability of abundance indices . . . . .                                                                                      | 389  |
| <b>Millner, R. S., and Whiting, C. L.</b> Long-term changes in growth and population abundance of sole in the North Sea from 1940 to the present . . . . .                                                                                              | 1185 |
| <b>Misund, O. A., and Beltestad, A. K.</b> Target-strength estimates of schooling herring and mackerel using the comparison method . . . . .                                                                                                            | 281  |
| <b>Misund, O. A., Aglen, A., Hamre, J., Ona, E., Røttingen, I., Skagen, D., and Valdemarsen, J. W.</b> Improved mapping of schooling fish near the surface: comparison of abundance estimates obtained by sonar and echo integration . . . . .          | 383  |
| <b>Mitson, R. B., Simard, Y., and Goss, C.</b> Use of a two-frequency algorithm to determine size and abundance of plankton in three widely spaced locations . . . . .                                                                                  | 209  |
| <b>Miyashita, K., Aoki, I., and Inagaki, T.</b> Swimming behaviour and target strength of isada krill ( <i>Euphausia pacifica</i> ). . . . .                                                                                                            | 303  |
| <b>Morgan, M. J., and Trippel, E. A.</b> Skewed sex ratios in spawning shoals of Atlantic cod ( <i>Gadus morhua</i> ) . . . . .                                                                                                                         | 820  |
| <b>Mukai, T., and Iida, K.</b> Depth dependence of target strength of live kokanee salmon in accordance with Boyle's law . . . . .                                                                                                                      | 245  |
| <b>Mulligan, T. J., and Kieser, R.</b> A split-beam echo-counting model for riverine use . . . . .                                                                                                                                                      | 403  |
| <b>Murray, A. W. A.</b> Comparison of geostatistical and random sample survey analyses of Antarctic krill acoustic data . . . . .                                                                                                                       | 415  |
| <b>Mutlu, E.</b> Target strength of the common jellyfish ( <i>Aurelia aurita</i> ): a preliminary experimental study with a dual-beam acoustic system . . . . .                                                                                         | 309  |
| <b>Myers, R. A., Barrowman, N. J., Hoenig, J. M., and Qu, Z.</b> The collapse of cod in Eastern Canada: the evidence from tagging data . . . . .                                                                                                        | 629  |
| <b>Nielsen, E., and Richardson, K.</b> Can changes in the fisheries yield in the Kattegat (1950–1992) be linked to changes in primary production? . . . . .                                                                                             | 988  |
| <b>Ona, E., and Mitson, R. B.</b> Acoustic sampling and signal processing near the seabed: the deadzone revisited . . . . .                                                                                                                             | 677  |
| <b>Pavlov, D. A., and Moksness, E.</b> Sensitive stages during embryonic development of wolffish, <i>Anarhichas lupus</i> L. determining the final numbers of rays in unpaired fins and skeletal abnormalities. . . . .                                 | 731  |
| <b>Pedersen, J.</b> Discrimination of fish layers using the three-dimensional information obtained by a split-beam echo-sounder . . . . .                                                                                                               | 371  |
| <b>Petitgas, P., and Levenez, J. J.</b> Spatial organization of pelagic fish: echogram structure, spatio-temporal condition, and biomass in Senegalese waters . . . . .                                                                                 | 147  |
| <b>Philippart, C. J. M., Lindeboom, H. J., van der Meer, J., van der Veer, H. W., and Witte, J. IJ.</b> Long-term fluctuations in fish recruit abundance in the western Wadden Sea in relation to variation in the marine environment . . . . .         | 1120 |
| <b>Pitcher, T. J., Misund, O. A., Fernø, A., Totland, B., and Melle, V.</b> Adaptive behaviour of herring schools in the Norwegian Sea as revealed by high-resolution sonar. . . . .                                                                    | 449  |
| <b>Pope, J. G., and Macer, C. T.</b> An evaluation of the stock structure of North Sea cod, haddock, and whiting since 1920, together with a consideration of the impacts of fisheries and predation effects on their biomass and recruitment . . . . . | 1157 |
| <b>Porteiro, C., Carrera, P., and Miguel, J.</b> Analysis of Spanish acoustic surveys for sardine, 1991–1993: abundance estimates and inter-annual variability. . . . .                                                                                 | 429  |
| <b>Ransom, B. H., Steig, T. W., and Neelson, P. A.</b> Comparison of hydroacoustic and net catch estimates of Pacific salmon smolt ( <i>Oncorhynchus</i> spp.) passage at hydro-power dams in the Columbia River Basin, USA. . . . .                    | 477  |

|                                                                                                                                                                                                       |      |
|-------------------------------------------------------------------------------------------------------------------------------------------------------------------------------------------------------|------|
| <b>Reynisson, P.</b> Evaluation of threshold-induced bias in the integration of single-fish echoes                                                                                                    | 345  |
| <b>Rice, J., and Gislason, H.</b> Patterns of change in the size spectra of numbers and diversity of the North Sea fish assemblage, as reflected in surveys and models                                | 1214 |
| <b>Rijnsdorp, A. D., and Millner, R. S.</b> Trends in population dynamics and exploitation of North Sea plaice ( <i>Pleuronectes platessa</i> L.) since the late 1800s                                | 1170 |
| <b>Rijnsdorp, A. D., and van Leeuwen, P. I.</b> Changes in growth of North Sea plaice since 1950 in relation to density, eutrophication, beam-trawl effort, and temperature                           | 1199 |
| <b>Rijnsdorp, A. D., van Leeuwen, P. I., Daan, N., and Heessen, H. J. L.</b> Changes in abundance of demersal fish species in the North Sea between 1906–1909 and 1990–1995                           | 1054 |
| <b>Roe, H. S. J., Griffiths, G., Hartman, M., and Crisp, N.</b> Variability in biological distributions and hydrography from concurrent Acoustic Doppler Current Profiler and SeaSoar surveys         | 131  |
| <b>Rogers, S. I., and Millner, R. S.</b> Factors affecting the annual abundance and regional distribution of English inshore demersal fish populations: 1973 to 1995                                  | 1094 |
| <b>Rose, G. A., and Porter, D. R.</b> Target-strength studies on Atlantic cod ( <i>Gadus morhua</i> ) in Newfoundland waters                                                                          | 259  |
| <b>Scalabrin, C., Diner, N., Weill, A., Hillion, A., and Mouchot, M-C.</b> Narrowband acoustic identification of monospecific fish shoals                                                             | 181  |
| <b>Selivanovsky, D. A., and Ezersky, A. B.</b> Sound scattering by hydrodynamic wakes of sea animals                                                                                                  | 377  |
| <b>Selivanovsky, D. A., Stunzhas, P. A., and Didenkulov, I. N.</b> Acoustical investigation of phytoplankton                                                                                          | 313  |
| <b>Serchuk, F. M., Kirkegaard, E., and Daan, N.</b> Status and trends of the major roundfish, flatfish, and pelagic fish stocks in the North Sea: thirty-year overview                                | 1130 |
| <b>Simmonds, E. J., Armstrong, F., and Copland, P. J.</b> Species identification using wideband backscatter with neural network and discriminant analysis                                             | 189  |
| <b>Simmonds, E. J., and Fryer, R. J.</b> Which are better, random or systematic acoustic surveys? A simulation using North Sea herring as an example                                                  | 39   |
| <b>Smith, S. J., and Page, F. H.</b> Associations between Atlantic cod ( <i>Gadus morhua</i> ) and hydrographic variables: implications for the management of the 4VsW cod stock                      | 597  |
| <b>Socha, D. G., Watkins, J. L., and Brierley, A. S.</b> A visualization-based post-processing system for analysis of acoustic data                                                                   | 335  |
| <b>Soria, M., Fréon, P., and Gerlotto, F.</b> Analysis of vessel influence on spatial behaviour of fish schools using a multi-beam sonar and consequences for biomass estimates by echo-sounder       | 453  |
| <b>Soule, M. A., Hampton, I., and Barange, M.</b> Potential improvements to current methods of recognizing single targets with a split-beam echo-sounder                                              | 237  |
| <b>Sparholt, H.</b> Causal correlation between recruitment and spawning stock size of central Baltic cod?                                                                                             | 771  |
| <b>Spencer, P. D., and Collie, J. S.</b> A simple predator–prey model of exploited marine fish populations incorporating alternative prey                                                             | 615  |
| <b>Stanley, D. R., and Wilson, C. A.</b> Abundance of fishes associated with a petroleum platform as measured with dual-beam hydroacoustics                                                           | 473  |
| <b>Stanton, T. K., Chu, D., and Wiebe, P. H.</b> Acoustic scattering characteristics of several zooplankton groups                                                                                    | 289  |
| <b>Steig, T. W., and Johnston, S. V.</b> Monitoring fish movement patterns in a reservoir using horizontally scanning split-beam techniques                                                           | 435  |
| <b>Stefánsson, G.</b> Analysis of groundfish survey abundance data: combining the GLM and delta approaches                                                                                            | 577  |
| <b>Suthers, I. M., and Sundby, S.</b> Role of the midnight sun: comparative growth of pelagic juvenile cod ( <i>Gadus morhua</i> ) from the Arcto-Norwegian and a Nova Scotian stock                  | 827  |
| <b>Suuronen, P., Perez-Comas, J. A., Lehtonen, E., and Tschernij, V.</b> Size-related mortality of herring ( <i>Clupea harengus</i> L.) escaping through a rigid sorting grid and trawl codend meshes | 691  |
| <b>Takao, Y., and Furusawa, M.</b> Dual-beam echo integration method for precise acoustic surveys                                                                                                     | 351  |
| <b>Tameishi, H., Shinomiya, H., Aoki, I., and Sugimoto, T.</b> Understanding Japanese sardine migrations using acoustic and other aids                                                                | 167  |
| <b>Tarbox, K. E., and Thorne, R. E.</b> Assessment of adult salmon in near-surface waters of Cook Inlet, Alaska                                                                                       | 397  |

Index to Volume 53

|                                                                                                                                                                                                                           |      |
|---------------------------------------------------------------------------------------------------------------------------------------------------------------------------------------------------------------------------|------|
| <b>Thompson, C. H., and Love, R. H.</b> Determination of fish size distributions and areal densities using broadband low-frequency measurements . . . . .                                                                 | 197  |
| <b>Traynor, J. J.</b> Target-strength measurements of walleye pollock ( <i>Theragra chalcogramma</i> ) and Pacific whiting ( <i>Merluccius productus</i> ). . . . .                                                       | 253  |
| <b>Turrell, W. R., Slessor, G., Payne, R., Adams, R. D., and Gillibrand, P. A.</b> Hydrography of the East Shetland Basin in relation to decadal North Sea variability . . . . .                                          | 899  |
| <b>Ulltang, Ø.</b> Stock assessment and biological knowledge: can prediction uncertainty be reduced? . . . . .                                                                                                            | 659  |
| <b>van Leussen, W., Radach, G., van Raaphorst, W. Colijn, F., and Laane, R.</b> The North-West European Shelf Programme (NOWESP): integrated analysis of shelf processes based on existing data sets and models . . . . . | 926  |
| <b>Walker, P. A., and Heessen, H. J. L.</b> Long-term changes in ray populations in the North Sea . . . . .                                                                                                               | 1085 |
| <b>Watkins, J. L., and Brierley, A. S.</b> A post-processing technique to remove background noise from echo integration data . . . . .                                                                                    | 339  |
| <b>Williamson, N. J., and Traynor, J. J.</b> Application of a one-dimensional geostatistical procedure to fisheries acoustic surveys of Alaskan pollock . . . . .                                                         | 423  |
| <b>Winters, G. H., and Wheeler, J. P.</b> Environmental and phenotypic factors affecting the reproductive cycle of Atlantic herring . . . . .                                                                             | 73   |
| <b>Witbaard, R.</b> Growth variations in <i>Arctica islandica</i> L. (Mollusca): a reflection of hydrography-related food supply . . . . .                                                                                | 981  |
| <b>Ye, Z., Curran, T., and Lemon, D.</b> Fish detection by an acoustic scintillation technique . . . . .                                                                                                                  | 317  |
| <b>Ye, Z., and Farmer, D. M.</b> Acoustic scattering by fish in the forward direction . . . . .                                                                                                                           | 249  |
| <b>Zakharia, M. E., Magand, F., Hetroit, F., and Diner, N.</b> Wideband sounder for fish species identification at sea . . . . .                                                                                          | 203  |
| <br><b>Memorial</b>                                                                                                                                                                                                       |      |
| <b>Professor Ray Beverton</b> . . . . .                                                                                                                                                                                   | 1    |
| <b>Introduction to Symposium on Fisheries and Plankton Acoustics.</b> . . . . .                                                                                                                                           | 129  |
| <b>Introduction to Symposium on Changes in the North Sea Ecosystem and Their Causes: Århus 1975 Revisited.</b> . . . . .                                                                                                  | 879  |
| <b>Symposium Contributions</b> . . . . .                                                                                                                                                                                  | 519  |
| <br><b>Short communications</b>                                                                                                                                                                                           |      |
| <b>Basford, D. J., Moore, D. C., and Eleftheriou, A. S.</b> Variations in benthos in the north-western North Sea in relation to the inflow of Atlantic water, 1980–1984 . . . . .                                         | 957  |
| <b>Boddeke, R., and Vingerhoed, B.</b> The anchovy returns to the Wadden Sea . . . . .                                                                                                                                    | 1003 |
| <b>de Groot, S. J.</b> The physical impact of marine aggregate extraction in the North Sea. . . . .                                                                                                                       | 1051 |
| <b>Frid, C. L. J., Buchanan, J. B., and Garwood, P. R.</b> Variability and stability in benthos: twenty-two years of monitoring off Northumberland. . . . .                                                               | 978  |
| <b>Hasti, L. C.</b> Estimation of trawl codend selectivity for squid ( <i>Loligo forbesi</i> ), based on Scottish research vessel survey data . . . . .                                                                   | 741  |
| <b>Heessen, H. J. L.</b> Time-series data for a selection of forty fish species caught during the International Bottom Trawl Survey . . . . .                                                                             | 1079 |
| <b>Heessen, H. J. L., Hislop, J. R. G., and Boon, T. W.</b> An invasion of the North Sea by blue-mouth, <i>Helicolenus dactylopterus</i> (Pisces, Scorpaenidae). . . . .                                                  | 874  |
| <b>Millner, R., Flatman, S., Rijnsdorp, A. D., van Beek, F. A., De Clerck, R., Damm, U., Tetard, A., and Forest, A.</b> Comparison of long-term trends in growth of sole and plaice populations . . . . .                 | 1196 |
| <b>Modin, J., Fagerholm, B., Gunnarsson, B., and Pihl, L.</b> Changes in otolith microstructure at metamorphosis of plaice, <i>Pleuronectes platessa</i> L. . . . .                                                       | 745  |
| <b>Pedersen, B.</b> Metal concentration in biota in the North sea: changes and causes . . . . .                                                                                                                           | 1008 |
| <b>Referees to Symposium on Fisheries and Plankton Acoustics.</b> . . . . .                                                                                                                                               | 513  |
| <b>Referees to Symposium on Changes in the North Sea Ecosystem and Their Causes: Århus 1975 Revisited.</b> . . . . .                                                                                                      | 1226 |
| <b>Editorial Note: Platinum Jubilee.</b> . . . . .                                                                                                                                                                        | 749  |
| <b>Erratum</b> . . . . .                                                                                                                                                                                                  | 641  |
